# Supplementary material for: Regional difference in runoff regimes and changes in the Yarlung Zangbo river basin
Source: Copernicus journal article supplement (doi:10.5194/hess-2023-16), 2023-02-08
Supplement: Supplementary file 1 [file hess-2023-16-supplement.pdf]

Supporting Information for

**Regional difference in runoff regimes and changes in the Yarlung Zangbo river basin of southern Tibetan Plateau**

He Sun<sup>1\*</sup>, Tandong Yao<sup>1,2</sup>, Fengge Su<sup>1,2\*</sup>, Wei Yang<sup>1,2</sup>, Guifeng Huang<sup>1</sup>, Deliang Chen<sup>3</sup>

<sup>1</sup>State Key Laboratory of Tibetan Plateau Earth System, Environment and Resources (TPESER), Institute of Tibetan Plateau Research, Chinese Academy of Sciences, Beijing 100101, China

<sup>2</sup>University of Chinese Academy of Sciences, Beijing 100101, China

<sup>3</sup>Regional Climate Group, Department of Earth Sciences, University of Gothenburg, Gothenburg 405 30, Sweden

\*Corresponding author: He Sun; Fengge Su

State Key Laboratory of Tibetan Plateau Earth System, Resources and Environment, Institute of Tibetan Plateau Research, Chinese Academy of Sciences, Beijing 100101, China

Email: sunhe@itpcas.ac.cn; fgsu@itpcas.ac.cn

**Captions:**

**Figure S1.** Mean monthly precipitation, temperature, and simulated total runoff in the YZ and its sub-basins for 1971–2020.

**Figure S2.** Monthly time series of observed and simulated runoff at eight hydrological stations in sub-basins of the YZ for 1971–2015 (1981–2000 for YG and 2004–2013 for BM).

**Figure S3.** Annual variations of precipitation, temperature, total runoff, and three runoff components (rainfall, glacier, and snowmelt runoff) in the LZ sub-basin for 1971–2020, respectively.

**Figure S4.** Annual variations of precipitation, temperature, total runoff, and three runoff components (rainfall, glacier, and snowmelt runoff) in the RKZ sub-basin for 1971–2020, respectively.

**Figure S5.** Annual variations of precipitation, temperature, total runoff, and three runoff components (rainfall, glacier, and snowmelt runoff) in the LS sub-basin for 1971–2020, respectively.

**Figure S6.** Annual variations of precipitation, temperature, total runoff and three runoff components (rainfall, glacier, and snowmelt runoff) in the LZ-YC sub-basin for 1971–2020, respectively.

**Figure S7.** Annual variations of precipitation, temperature, total runoff, and three runoff components (rainfall, glacier, and snowmelt runoff) in the YC-NX sub-basin for 1971–2020, respectively.

**Figure S8.** Annual correlation between total runoff and precipitation, temperature, and three runoff components (rainfall, glacier, and snowmelt runoff) in the YZ and its sub-basins for 1971–2020, respectively. Asterisks indicate 95% significance level.

**Figure S9.** Annual variations of contributions of rainfall, glacier, and snowmelt runoff to total runoff in the YZ and its NX and NX-BXK sub-basins for 1971–2020, respectively.

**Figure S10.** Mean monthly vertical integral of atmospheric moisture budget (mm) in June, July, August, and September from the ERA5 data across the Yarlung Zangbo river basin for 1978–2020

(indicated by colors). Arrows represent the directions of vertical integral of water vapor flux ( $\text{kg}\cdot\text{m}^{-1}\cdot\text{s}^{-1}$ ).

**Table S1.** Changes in mean seasonal precipitation (%), temperature ( $^{\circ}\text{C}$ ), total runoff, and three components (%), and their contributions to total runoff (%) in 1998–2020 relative to the period 1971–1997 in the entire YZ and its NX and NX-BXK sub-basins.

**Table S2.** Threshold of drought and flood events, and tendency of drought, flood, and annual maximum daily runoff in the entire YZ and its NX and NX-BXK sub-basins.

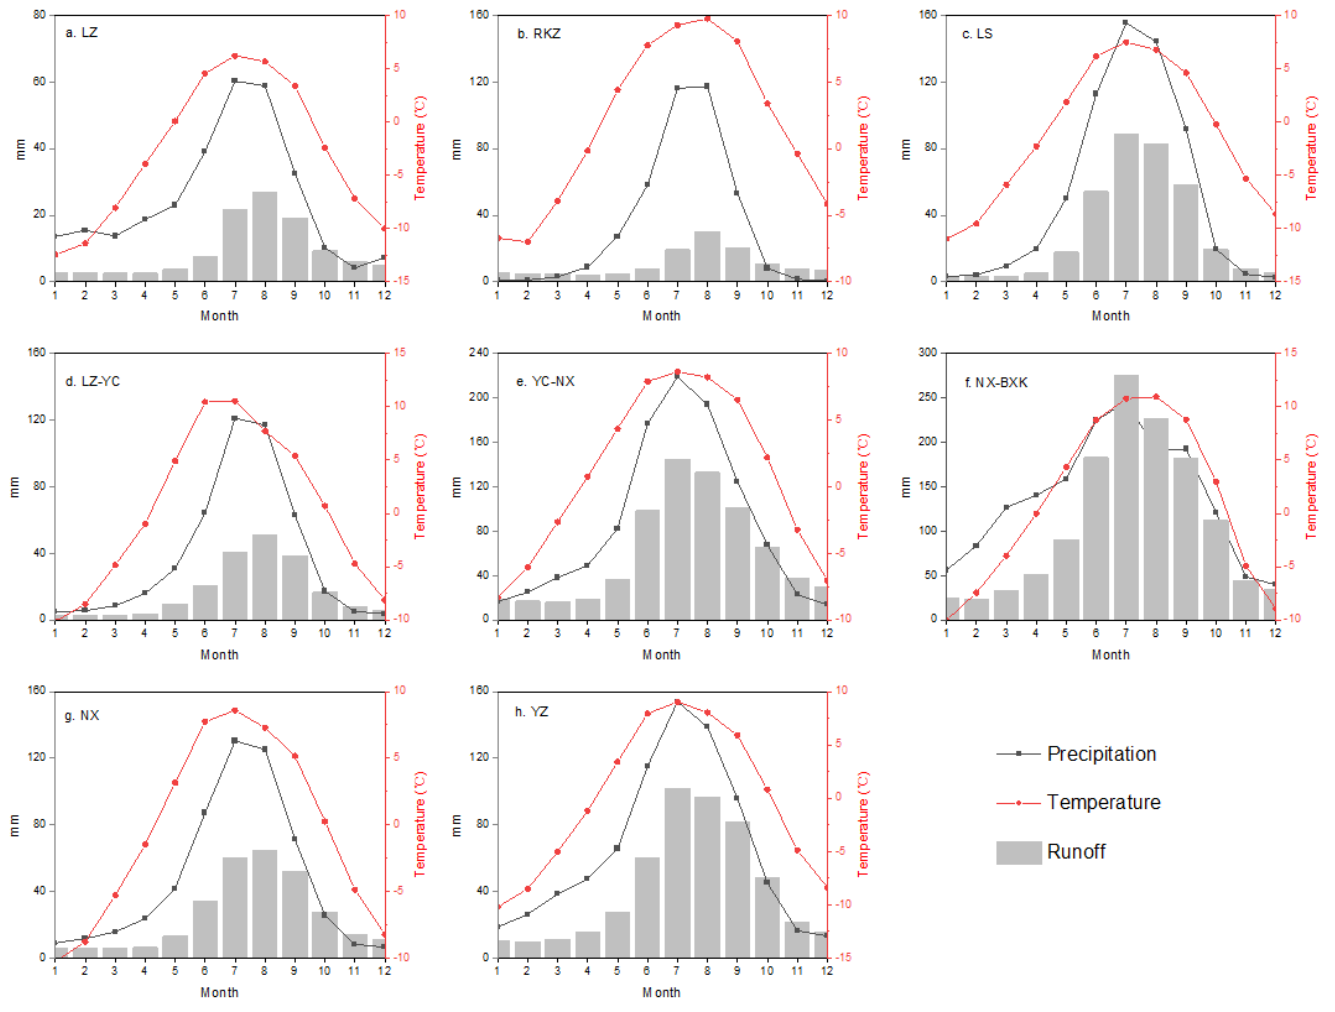

**Figure S1.** Mean monthly precipitation, temperature, and simulated total runoff in the YZ and its sub-basins for 1971–2020.

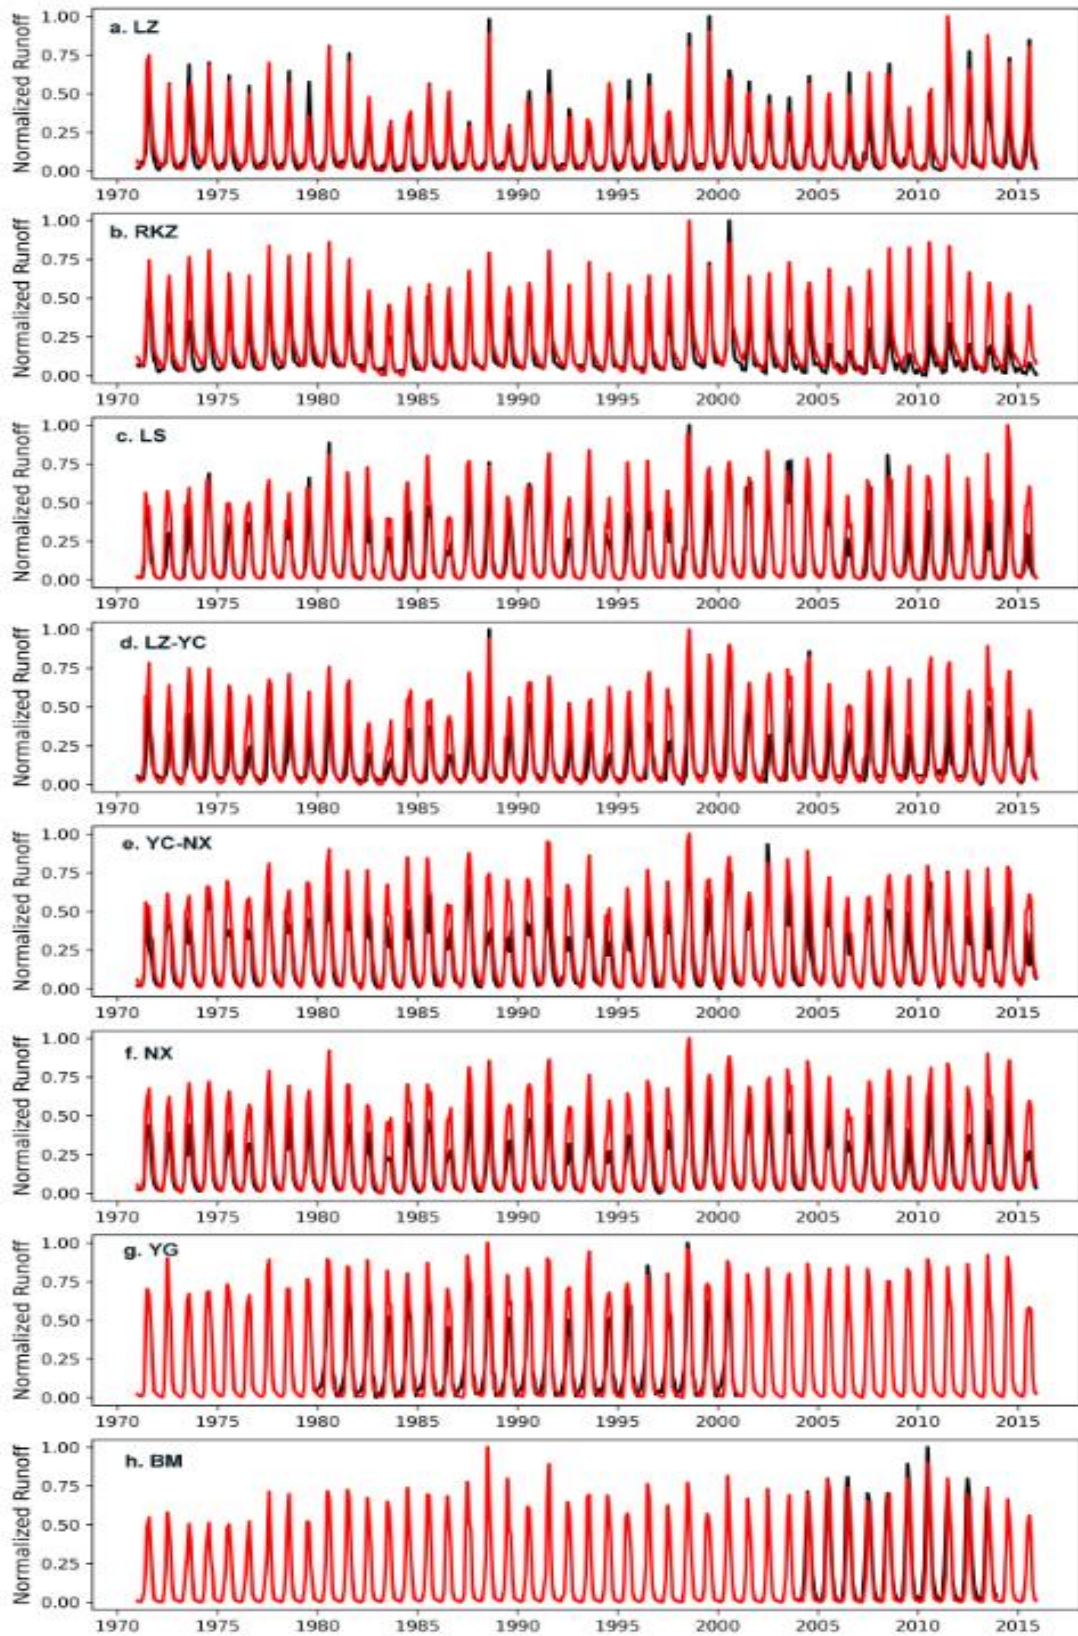

**Figure S2.** Monthly time series of observed and simulated runoff at eight hydrological stations in sub-basins of the YZ for 1971–2015 (1981–2000 for YG and 2004–2013 for BM).

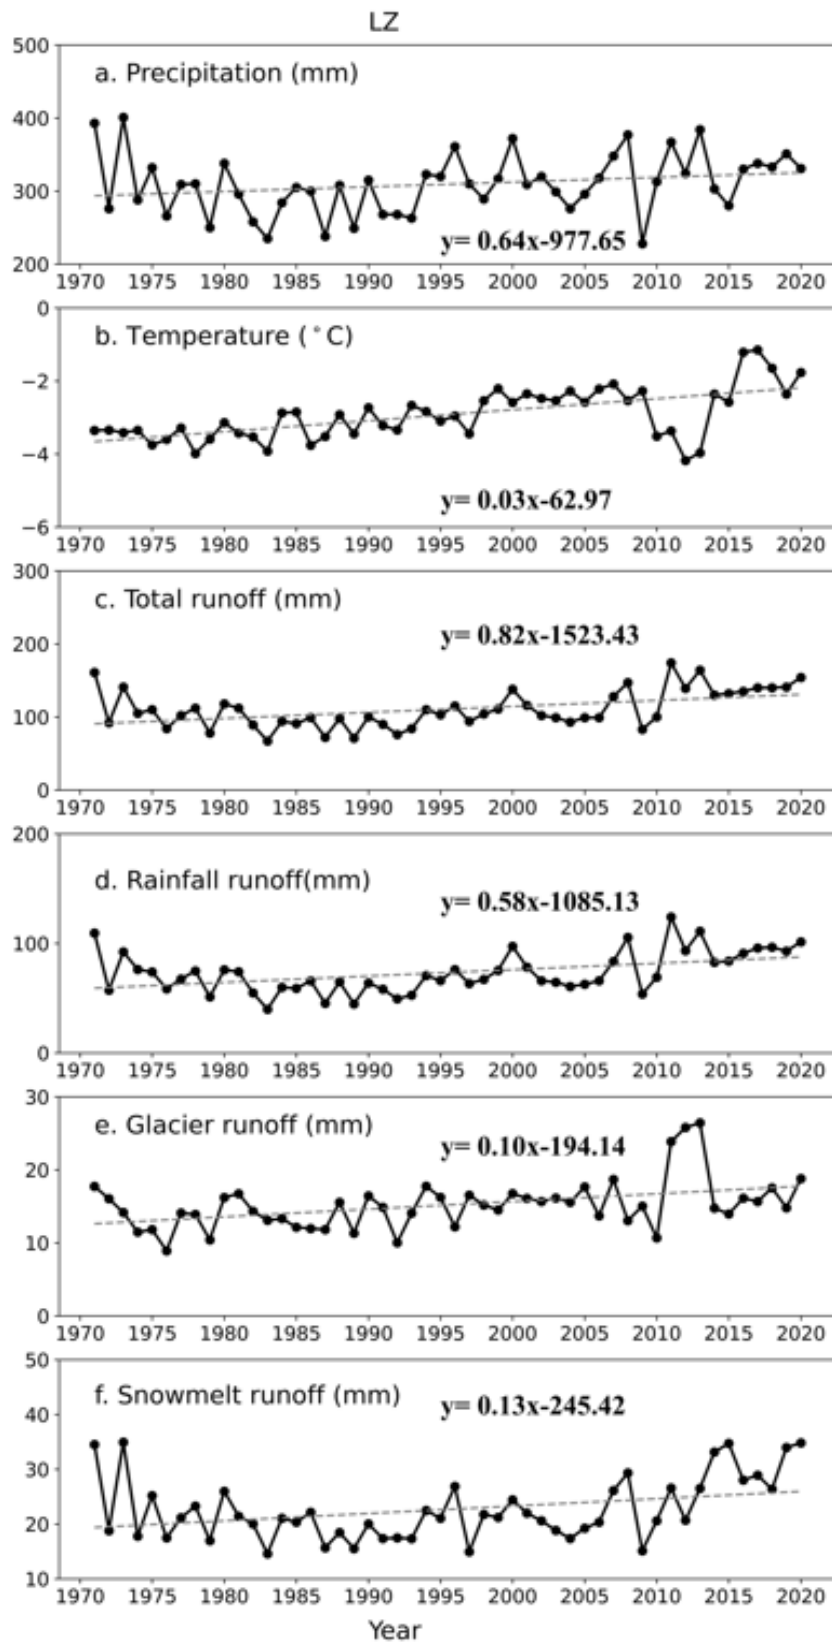

**Figure S3.** Annual variations of precipitation, temperature, total runoff, and three runoff components (rainfall, glacier, and snowmelt runoff) in the LZ sub-basin for 1971–2020, respectively.

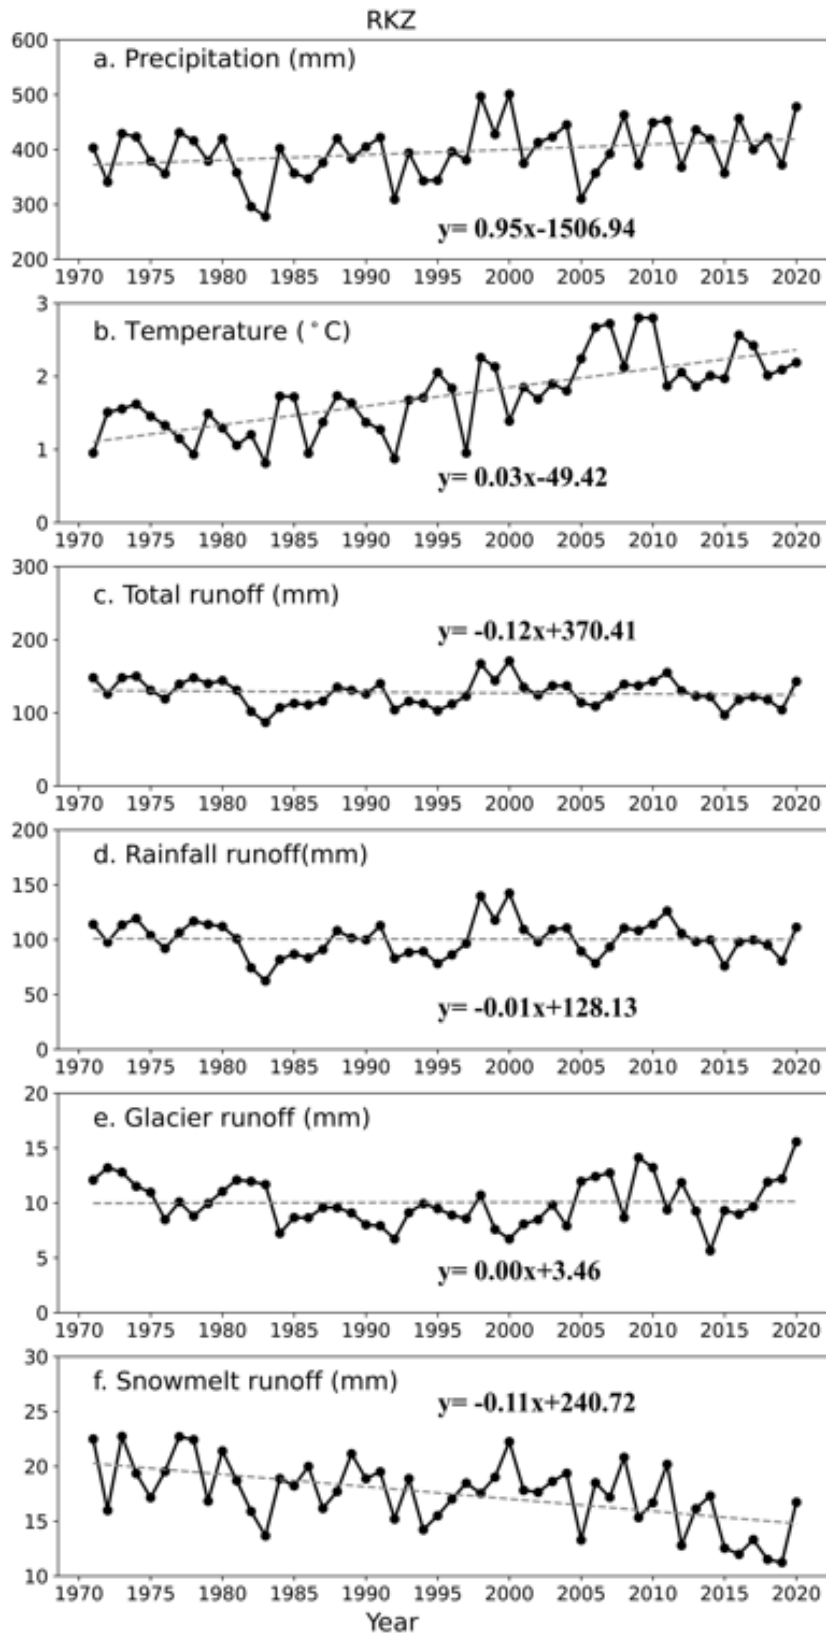

**Figure S4.** Annual variations of precipitation, temperature, total runoff, and three runoff components (rainfall, glacier, and snowmelt runoff) in the RKZ sub-basin for 1971–2020, respectively.

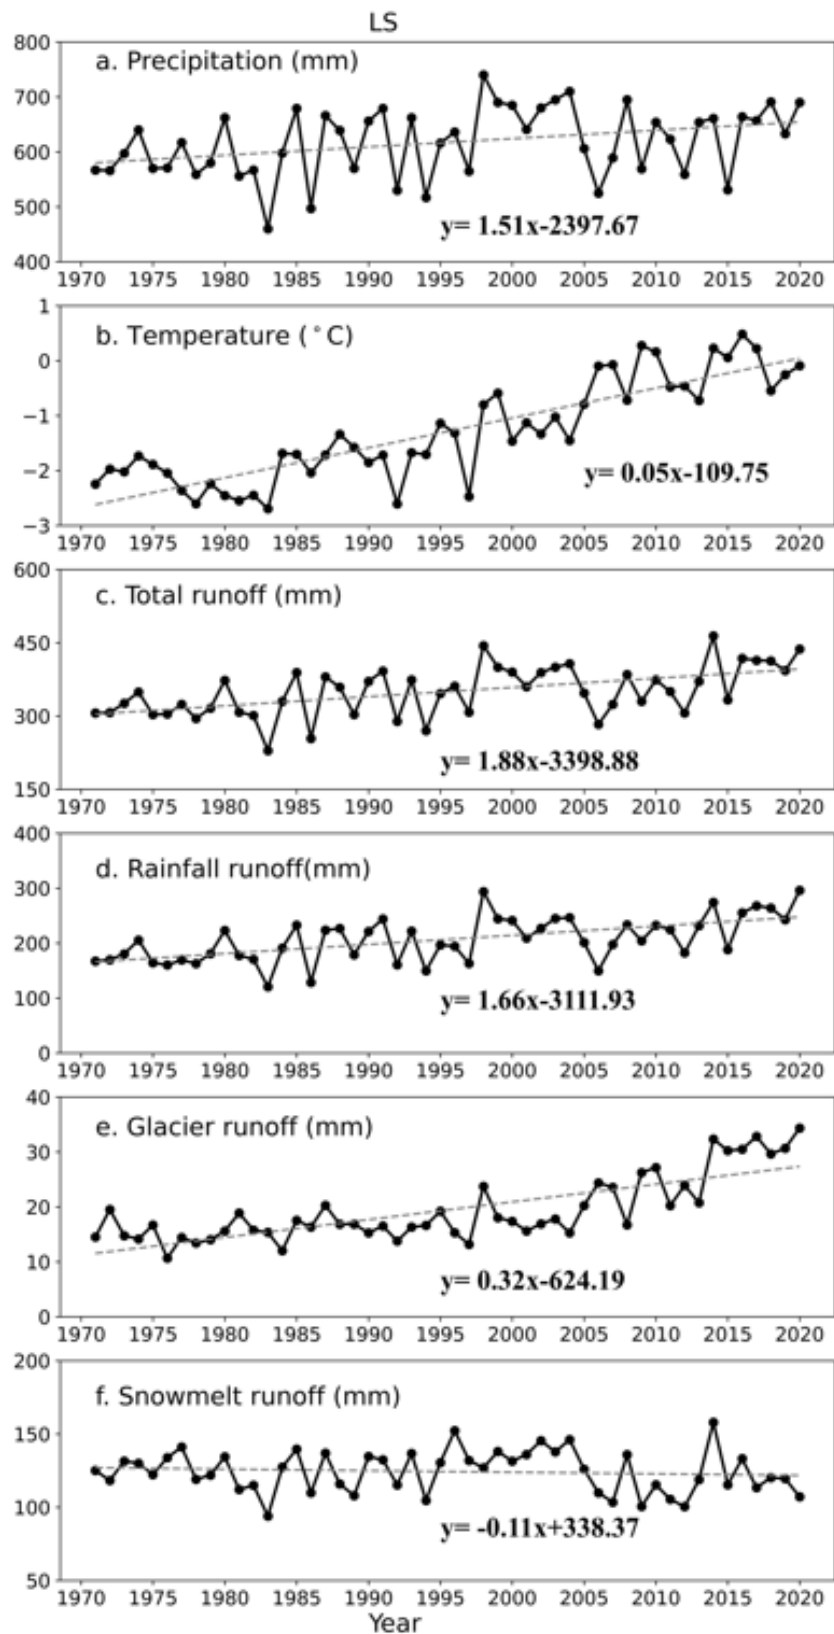

**Figure S5.** Annual variations of precipitation, temperature, total runoff, and three runoff components (rainfall, glacier, and snowmelt runoff) in the LS sub-basin for 1971–2020, respectively.



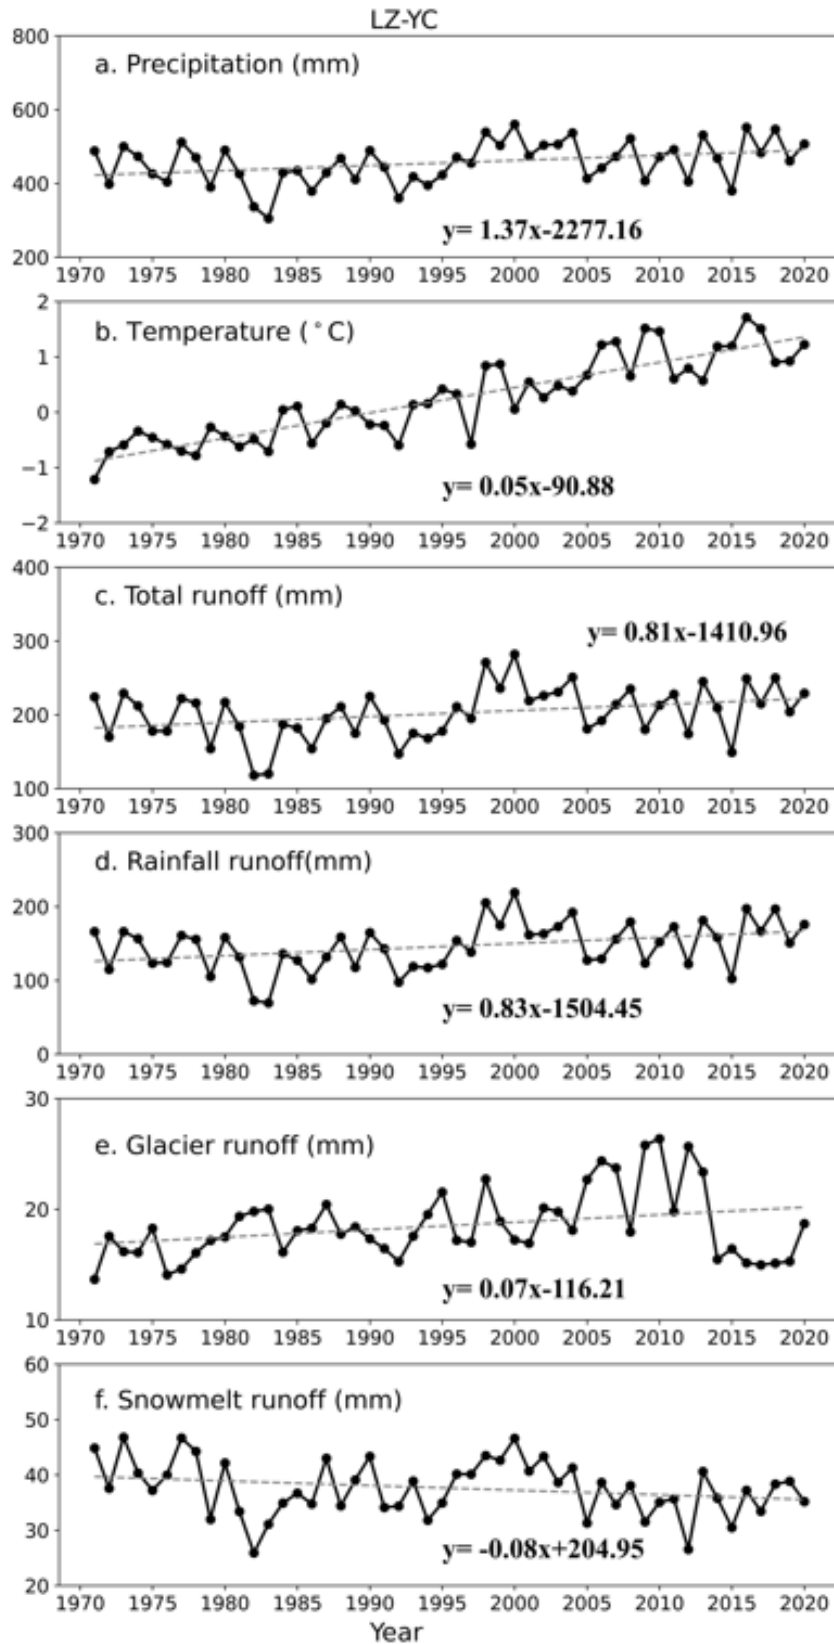

**Figure S6.** Annual variations of precipitation, temperature, total runoff, and three runoff components (rainfall, glacier, and snowmelt runoff) in the LZ-YC sub-basin for 1971–2020, respectively.

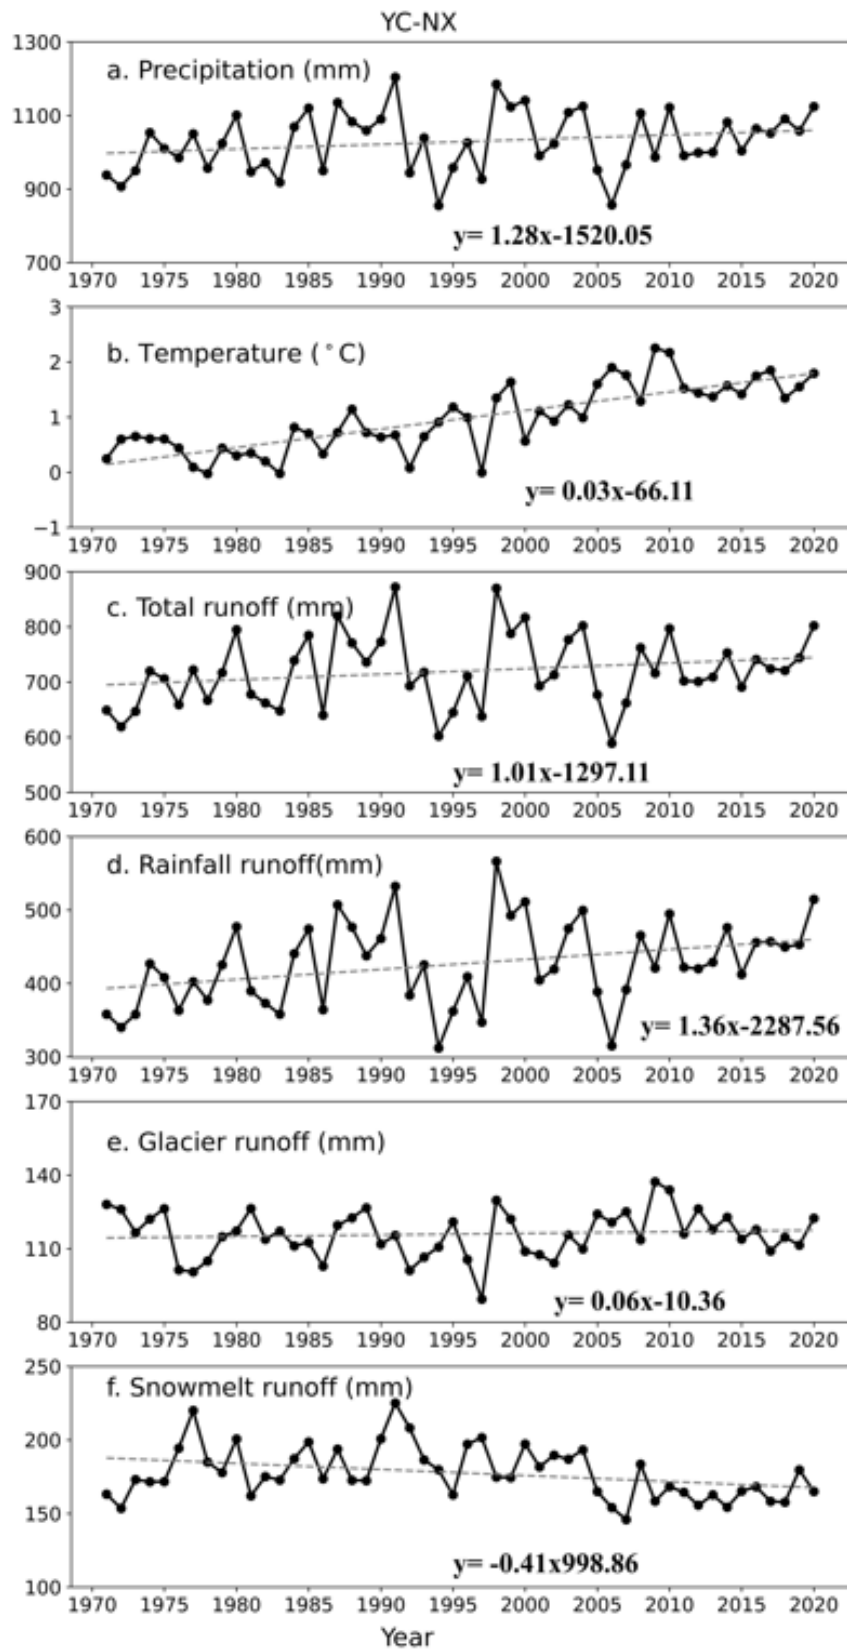

**Figure S7.** Annual variations of precipitation, temperature, total runoff, and three runoff components (rainfall, glacier, and snowmelt runoff) in the YC-NX sub-basin for 1971–2020, respectively.

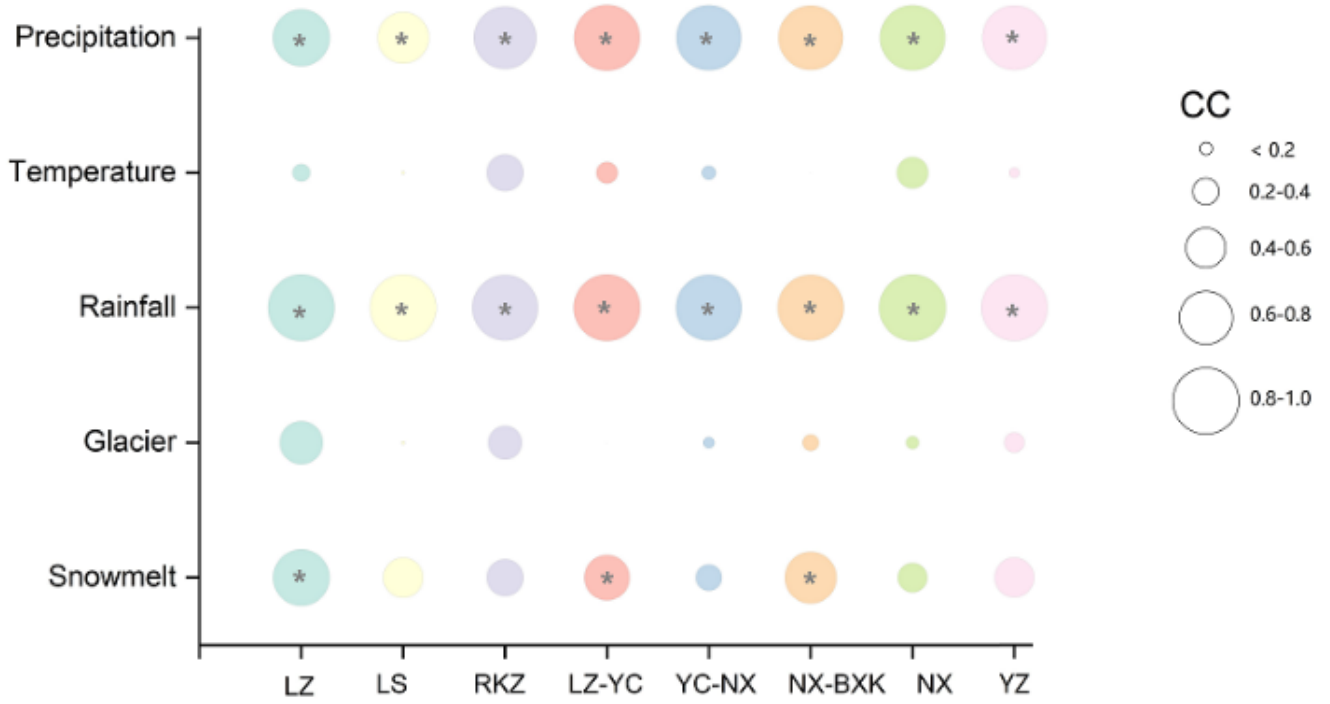

**Figure S8.** Annual correlation between total runoff and precipitation, temperature, and three runoff components (rainfall, glacier, and snowmelt runoff) in the YZ and its sub-basins for 1971–2020, respectively. Asterisks indicate 95% significance level.

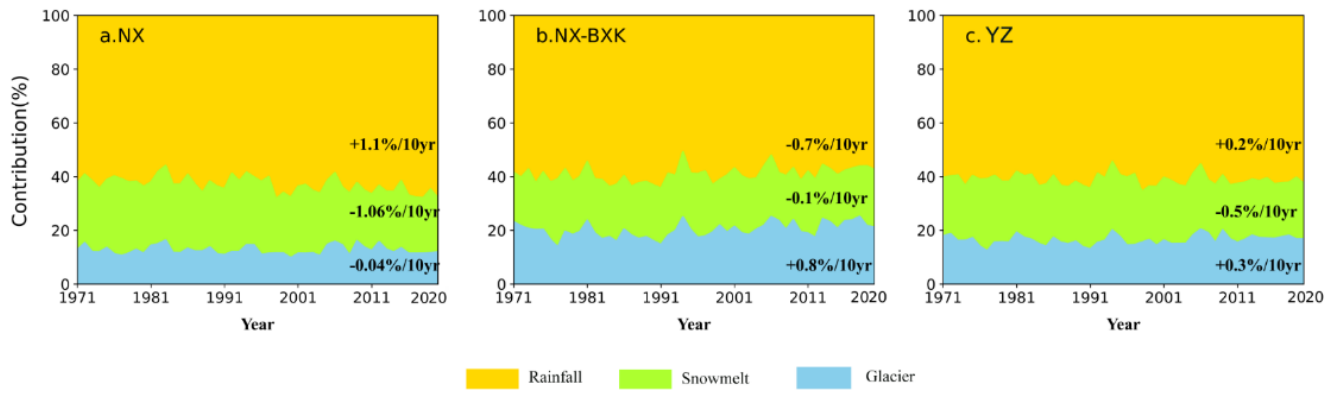

**Figure S9.** Annual variations of contributions of rainfall, glacier, and snowmelt runoff to total runoff in the YZ and its NX and NX-BXK sub-basins for 1971–2020, respectively.

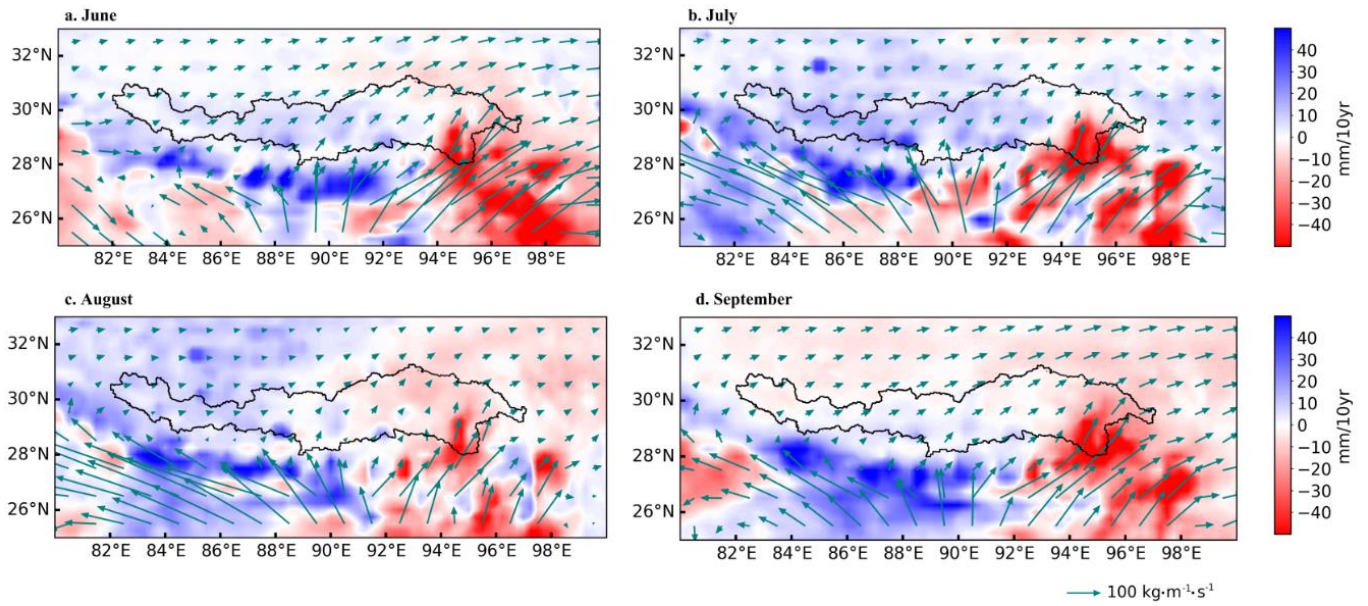

**Figure S10.** Mean monthly vertical integral of atmospheric moisture budget (mm) in June, July, August, and September from the ERA5 data across the Yarlung Zangbo river basin for 1978–2020 (indicated by colors). Arrows represent the directions of vertical integral of water vapor flux ( $\text{kg}\cdot\text{m}^{-1}\cdot\text{s}^{-1}$ ).

**Table S1.** Changes in mean seasonal precipitation (%), temperature (°C), total runoff and three components (%), and their contributions to total runoff (%) in 1998–2020 relative to the period 1971–1997 in the entire YZ and its NX and NX-BXK sub-basins.

|        | Month | Pre    | Tem  | Total  | Glacier | Snow melt | Rainfall | CG    | CS    | CR    |
|--------|-------|--------|------|--------|---------|-----------|----------|-------|-------|-------|
| NX     | Jan   | 1.31   | 1.19 | 4.83   | 77.72   | 54.4      | 3.57     | 0.03  | 1.15  | -1.18 |
|        | Feb   | 3.01   | 1.17 | 4.84   | 44.75   | 35.68     | 2.99     | 0.08  | 1.62  | -1.70 |
|        | Mar   | -0.88  | 0.35 | 9.41   | 15.5    | 50.35     | 2.65     | 0.07  | 5.09  | -5.16 |
|        | Apr   | 6.14   | 0.85 | 17.19  | 11.11   | 33.49     | 4.82     | -0.33 | 5.70  | -5.37 |
|        | May   | 17.62  | 0.4  | 22     | 6.56    | 23.58     | 25.24    | -1.42 | 0.81  | 0.61  |
|        | Jun   | 9.08   | 0.55 | 10.83  | 9.3     | -2.47     | 30.16    | -0.23 | -6.17 | 6.40  |
|        | Jul   | 15.81  | 0.44 | 20.74  | 8.91    | -9.2      | 37.54    | -1.71 | -5.92 | 7.63  |
|        | Aug   | 8.28   | 0.59 | 11.36  | 8.79    | -14.35    | 20.41    | -0.34 | -4.84 | 5.18  |
|        | Sep   | -2.58  | 0.69 | 6.63   | 12.72   | -19.89    | 16.22    | 0.88  | -6.42 | 5.54  |
|        | Oct   | 6.15   | 0.7  | 6.14   | 20.83   | -3.94     | 8.61     | 0.93  | -2.30 | 1.37  |
|        | Nov   | -11.89 | 1.54 | 7.05   | 2.53    | 29.92     | 4.3      | -0.05 | 2.35  | -2.30 |
|        | Dec   | -11.19 | 2.2  | 5.74   | 12.6    | 24.49     | 4.99     | 0.01  | 0.70  | -0.71 |
| NX-BXK | Jan   | -9.97  | 0.63 | -9.54  | -16.55  | -4.14     | -9.84    | 0.00  | 0.33  | -0.33 |
|        | Feb   | -16.21 | 0.69 | -14.74 | 12.27   | -18.2     | -14.21   | 0.03  | -0.79 | 0.77  |
|        | Mar   | -15.12 | -0.1 | -18.38 | -19.86  | -28.89    | -13.89   | 0.02  | -3.87 | 3.85  |
|        | Apr   | -11.04 | 0.16 | -19.61 | -20.57  | -17.26    | -21.08   | -0.02 | 1.02  | -1.00 |
|        | May   | 3.11   | 0.09 | -13.28 | 1.65    | -5.45     | -21.75   | 0.66  | 3.10  | -3.77 |
|        | Jun   | -8.35  | 0.35 | -6.32  | 4.43    | -6.08     | -9.86    | 1.54  | 0.15  | -1.68 |
|        | Jul   | -3.15  | 0.41 | -1.34  | 11.85   | -9.5      | -3.06    | 2.81  | -1.90 | -0.91 |
|        | Aug   | 5.23   | 0.34 | -3.54  | 5.02    | -21       | -3.97    | 2.76  | -2.39 | -0.37 |
|        | Sep   | -20.5  | 0.57 | -5.98  | -0.1    | -15.41    | -7.94    | 1.69  | -0.81 | -0.88 |
|        | Oct   | -10.74 | 0.46 | -16.49 | 14.12   | -22.58    | -22.93   | 6.16  | -0.38 | -5.78 |
|        | Nov   | -9.09  | 0.51 | -7.05  | -0.28   | 6.97      | -7.85    | 0.09  | 0.64  | -0.72 |
|        | Dec   | -18.61 | 0.86 | -8.29  | 6.76    | -14.03    | -8.09    | 0.02  | -0.20 | 0.17  |
| YZ     | Jan   | -3.19  | 0.58 | -1.01  | 10.56   | 8.3       | -1.4     | 0.00  | 0.37  | -0.37 |
|        | Feb   | -5.56  | 0.58 | -2.92  | 20.51   | -3.37     | -2.91    | 0.03  | -0.04 | 0.01  |
|        | Mar   | -6.06  | 0.14 | -4.76  | -2.93   | -8.45     | -3.72    | 0.03  | -0.74 | 0.71  |
|        | Apr   | -2.51  | 0.38 | -5.55  | -2.53   | -1.92     | -8.12    | 0.07  | 1.44  | -1.51 |
|        | May   | 5.28   | 0.18 | -1.75  | 1.8     | 2.93      | -8.11    | 0.17  | 2.11  | -2.28 |

|     |       |      |       |      |       |       |       |       |       |
|-----|-------|------|-------|------|-------|-------|-------|-------|-------|
| Jun | 1.01  | 0.28 | 0.48  | 3.25 | -1.25 | 1.43  | 0.37  | -0.85 | 0.48  |
| Jul | 4.88  | 0.23 | 3.87  | 5.81 | -5.58 | 6.96  | 0.46  | -2.14 | 1.68  |
| Aug | 3.88  | 0.29 | 2.51  | 3.08 | -9.65 | 5.46  | 0.10  | -1.87 | 1.76  |
| Sep | -5.79 | 0.36 | 0.93  | 1.84 | -10   | 3.16  | 0.26  | -1.63 | 1.37  |
| Oct | -1.87 | 0.35 | -3.48 | 8.36 | -7.61 | -4.86 | 1.61  | -0.63 | -0.98 |
| Nov | -5.79 | 0.72 | 0.43  | 0.31 | 10.92 | -0.77 | -0.01 | 1.07  | -1.06 |
| Dec | -9.2  | 1.04 | -0.27 | 3.87 | 4.21  | -0.48 | 0.01  | 0.22  | -0.23 |

---

*Note:* Pre= Precipitation; Tem= Temperature; CG= contribution of glacier runoff to total runoff; CS= contribution of snowmelt runoff to total runoff; CR= contribution of rainfall runoff to total runoff.

**Table S2.** Threshold of drought and flood events, and tendency of drought, flood, and annual maximum daily runoff in the entire YZ and its NX and NX-BXK sub-basins.

|                                                   |              | NX    | BXK  | YZ   |
|---------------------------------------------------|--------------|-------|------|------|
| Threshold (mm/day)                                | Drought (5%) | 0.17  | 0.74 | 0.32 |
|                                                   | Flood (95%)  | 2.34  | 9.52 | 3.61 |
| Tendency of drought (days/10year)                 | 1971-2020    | -6    | 6    | 3    |
|                                                   | 1971-1997    | -2    | 3    | 3    |
|                                                   | 1998-2020    | -4    | -3   | -1   |
| Tendency of flood (days/10year)                   | 1971-2020    | 6     | -3   | -1   |
|                                                   | 1971-1997    | 2     | 6    | 5    |
|                                                   | 1998-2020    | -1    | -6   | -4   |
| Tendency of annual maximum daily runoff (mm/10yr) | 1971-2020    | 0.1   | -0.3 | 0    |
|                                                   | 1971-1997    | 0.08  | 0.7  | 0.13 |
|                                                   | 1998-2020    | -0.01 | -0.5 | -0.1 |
